# Supplementary material
Source: MDPI journal article supplement (https://www.mdpi.com/2311-7524/8/12/1198)
Supplement: s1 [file s1]

## Supplemental materials

Table S1 Estimation of greenhouse gas emissions [1, 2]

| Source                    | Emission factor (EF, kg kg <sup>-1</sup> ) |                               |                  | fraction of<br>N lost (%) | Emission (CO <sub>2</sub> eq kg ha <sup>-1</sup> ) |      |      |       |       |
|---------------------------|--------------------------------------------|-------------------------------|------------------|---------------------------|----------------------------------------------------|------|------|-------|-------|
|                           | N                                          | P <sub>2</sub> O <sub>5</sub> | K <sub>2</sub> O |                           | CK                                                 | OM   | NPK  | NPK-H | NPKOM |
| Production                | 8.21 [3]                                   | 0.73 [2]                      | 0.50 [2]         | /                         | 0                                                  | 0    | 2217 | 4434  | 1108  |
| Transport                 | 0.09 [3]                                   | 0.06 [2]                      | 0.05 [2]         | /                         | 0                                                  | 0    | 38   | 75    | 19    |
| Direct N <sub>2</sub> O   |                                            |                               |                  |                           |                                                    |      |      |       |       |
| Chemical N                | 0.0175 [4]                                 | /                             | /                | /                         | 0                                                  | 0    | 2049 | 4098  | 1024  |
| Organic N                 | 0.0261 [4]                                 | /                             | /                | /                         | 0                                                  | 3813 | 0    | 0     | 1919  |
| Indirect N <sub>2</sub> O |                                            |                               |                  |                           |                                                    |      |      |       |       |
| Leaching                  | 0.011 [1]                                  | /                             | /                | 14.53 [5]                 | 0                                                  | 234  | 187  | 374   | 211   |
| Runoff                    | 0.011 [1]                                  | /                             | /                | 8.20 [6]                  | 0                                                  | 132  | 106  | 211   | 119   |

GHG (CO<sub>2</sub> equivalent) generated from the production (GHG<sub>Pr</sub>) and transportation (GHG<sub>Tr</sub>) of chemical fertilizers:

$$\text{GHG}_{\text{Pr}} \text{ or } \text{GHG}_{\text{Tr}} = \sum_{i=N,P,K}^3 \text{EF}_i \times F_i \quad (1)$$

The direct emission of N<sub>2</sub>O (dE<sub>N2O</sub>) from the application of chemical and organic N fertilizers:

$$\text{dE}_{\text{N2O}} = \sum_{i=\text{organic N, chemical N}}^2 \text{EF}_i \times F_{Ni} \quad (2)$$

The indirect N<sub>2</sub>O emissions (idE<sub>N2O</sub>) caused by the application of N fertilizers:

$$\text{idE}_{\text{N2O}} = F_N \times (14.53\% + 8.20\%) \times 0.011 \quad (3)$$

Conversion of direct and indirect emission of N<sub>2</sub>O (dE<sub>N2O</sub>) to CO<sub>2</sub> equivalent greenhouse gas emission (GHG<sub>FN</sub>):

$$\text{GHG}_{\text{FN}} = (\text{dE}_{\text{N2O}} + \text{idE}_{\text{N2O}}) \times \frac{44}{28} \times 298 \quad (4)$$

The total emission (GHG) from production, transportation and application of fertilizer:

$$\text{GHG}_A = \text{GHG}_{Pr} + \text{GHG}_{Tr} + \text{GHG}_{FN} \quad (5)$$

Conversion to yield and profit scaled  $\text{GHG}_Y$  and  $\text{GHG}_P$ :

$$\text{GHG}_Y = \text{GHG}_A \div \text{Yield} \quad (6)$$

$$\text{GHG}_P = \text{GHG}_A \div \text{Profit} \quad (7)$$

## References

1. Hergoualc'h, K.; Akiyama, H.; Bernoux, M.; Chirinda, N.; del Prado, A.; Kasimir, Å.; MacDonald, J.D.; Ogle, S.M.; Regina, K.; van der Weerden, T.J.  $\text{N}_2\text{O}$  emissions from managed soils, and  $\text{CO}_2$  emissions from lime and urea application. In *2019 Refinement to the 2006 IPCC Guidelines for National Greenhouse Gas Inventories Volume 4 Agriculture, Forestry and Other Land Use*, Calvo Buendia, E., Tanabe, K., Kranjc, A., Baasansuren, J., Fukuda, M., S., N., Osako, A., Pyrozhenko, Y., Shermanau, P., Federici, S., Eds.; The Intergovernmental Panel on Climate Change: Switzerland, 2019; Volume 4.
2. Forster, P.; Ramaswamy, V.; Artaxo, P.; Berntsen, T.; Betts, R.; Fahey, D.W.; Haywood, J.; Lean, J.; Lowe, D.C.; Myhre, G.; et al. Changes in Atmospheric Constituents and in Radiative Forcing. In *Climate Change 2007: The Physical Science Basis. Contribution of Working Group I to the Fourth Assessment Report of the Intergovernmental Panel on Climate Change*, Solomon, S., Qin, D., Manning, M., Chen, Z., Marquis, M., Averyt, K.B., M. Tignor, Miller, H.L., Eds.; Cambridge University Press: Cambridge, United Kingdom and New York, NY, USA., 2007.
3. Zhang, W.F.; Dou, Z.X.; He, P.; Ju, X.-T.; David, P. New technologies reduce greenhouse gas emissions from nitrogenous fertilizer in China. *Proc. Natl. Acad. Sci. U. S. A.* 2013, 110, 8375–8380, doi:10.1073/pnas.1210447110.
4. Wang, Y.; Yao, Z.; Pan, Z.; Wang, R.; Yan, G.; Liu, C.; Su, Y.; Zheng, X.; Butterbach-Bahl, K. Tea-planted soils as global hotspots for  $\text{N}_2\text{O}$  emissions from croplands. *Environ. Res. Lett.* 2020, 15, 104018, doi:10.1088/1748-9326/aba5b2.
5. Zheng, S. Study on the monitoring methods of nitrate leaching and features of nitrogen leaching in tea plantation. Chinese Academy of Agricultural Sciences, Beijing, 2022.
6. Xie, S.; Feng, H.; Yang, F.; Zhao, Z.; Hu, X.; Wei, C.; Liang, T.; Li, H.; Geng, Y. Does dual reduction in chemical fertilizer and pesticides improve nutrient loss and tea yield and quality? A pilot study in a green tea garden in Shaoxing, Zhejiang Province, China. *Environ. Sci. Pollut. Res.* 2019, 26, 2464–2476, doi:10.1007/s11356-018-3732-1.
